# Supplementary material for: Hepatic arterial infusion chemotherapy and immune checkpoint inhibitors, alone or in combination, in advanced hepatocellular carcinoma with macrovascular invasion: a single-centre experience in Taiwan
Source: PubMed Central journal article supplement — J Gastrointest Oncol. 2023 Apr 10;14(2):849–62. doi: 10.21037/jgo-22-858 (PMC10186549; doi:10.21037/jgo-22-858), 2023-04-10
Supplement: jgo-14-02-849-supplementary.pdf [file jgo-14-02-849-supplementary.pdf]

**Table S1** Previous therapies received in each group

| Characteristics                             | HAIC (n=70) | Systemic ICI (n=46) | HAIC and ICI (n=14) | P value |
|---------------------------------------------|-------------|---------------------|---------------------|---------|
| Previous therapies received, n (%)          |             |                     |                     |         |
| Surgical resection                          | 8 (24.24)   | 13 (39.39)          | 2 (33.33)           | 0.409   |
| TACE                                        | 17 (51.52)  | 17 (51.52)          | 5 (83.33)           | 0.379   |
| RFA/PEI                                     | 14 (42.42)  | 16 (48.48)          | 1 (16.67)           | 0.406   |
| HAIC                                        | 0 (0.00)    | 9 (27.27)           | 0 (0.00)            | 0.002   |
| TKI                                         | 22 (66.67)  | 26 (78.79)          | 5 (83.33)           | 0.556   |
| Systemic chemotherapy                       | 1 (3.03)    | 1 (3.03)            | 0 (0.00)            | 1.000   |
| Immunotherapy                               | 2 (6.06)    | 0 (0.00)            | 0 (0.00)            | 0.574   |
| Radiotherapy                                | 3 (9.09)    | 4 (12.12)           | 1 (16.67)           | 0.860   |
| Clinical trial                              | 0 (0.00)    | 0 (0.00)            | 1 (16.67)           | 0.083   |
| Previous systemic therapies received, n (%) |             |                     |                     |         |
| Naïve                                       | 48 (68.6)   | 20 (43.5)           | 9 (64.3)            | 0.071   |
| 1                                           | 21 (30.0)   | 24 (52.2)           | 5 (35.7)            |         |
| 2                                           | 1 (1.4)     | 2 (4.3)             | 0                   |         |
| Kind of previous systemic therapy, n (%)    |             |                     |                     |         |
| Sorafenib                                   | 19 (27.1)   | 22 (47.8)           | 4 (28.6)            | 0.872   |
| Lenvatinib                                  | 2 (2.9)     | 2 (4.3)             | 1 (7.1)             |         |
| Sorafenib + regorafenib                     | 0           | 1 (2.2)             | 0                   |         |
| Sorafenib + lenvatinib                      | 1 (1.4)     | 1 (2.2)             | 0                   |         |
| Systemic chemotherapy                       | 1 (1.4)     | 0                   | 0                   |         |

HAIC, hepatic arterial infusion chemotherapy; ICI, immune checkpoint inhibitor; PEI, percutaneous ethanol injection; RFA, radiofrequency ablation; TACE, transcatheter arterial chemoembolization; TKI, tyrosine kinase inhibitor.

**Table S2** Category and dosage of PD-1 inhibitors used in the ICI alone and HAIC combined with ICI groups

| Category                                                       | ICI (n=46)                              | HAIC and ICI (n=14)                          | P value |
|----------------------------------------------------------------|-----------------------------------------|----------------------------------------------|---------|
| Nivolumab, n (%)                                               | 25 (54.4)                               | 5 (35.7)                                     | 0.360   |
| Median ICIs cycle [range]                                      | 5 [1–35]                                | 3 [1–28]                                     | 0.466   |
| Median cumulative dose [range] (mg)                            | 800 [140–5,250]                         | 600 [100–5,600]                              | 0.717   |
| Pembrolizumab, n (%)                                           | 11 (23.9)                               | 8 (57.1)                                     | 0.046   |
| Median ICIs cycle [range]                                      | 6 [3–13]                                | 4 [1–17]                                     | 0.135   |
| Median cumulative dose [range] (mg)                            | 700 [300–1,300]                         | 400 [100–1,800]                              | 0.237   |
| Nivolumab plus ipilimumab, n (%)                               | 4 (8.7)                                 | 0 (0.0)                                      | 0.564   |
| Median ICIs cycle [range]                                      | 2 [2–4]                                 | –                                            | –       |
| Median cumulative dose [range] (nivolumab/ipilimumab)          | 200/400 [200–400/400–800]               | –                                            | –       |
| Atezolizumab plus bevacizumab, n (%)                           | 5 (10.9)                                | 1 (7.1)                                      | 1.000   |
| Median ICIs cycle [range]                                      | 15 [2–17]                               | 7 [7–7]                                      | 0.558   |
| Median cumulative dose [range] (atezolizumab/bevacizumab) (mg) | 12,000/4,800 [2,400–20,400/2,000–9,000] | 8,400/3,176.5 [8,400–8,400, 3,176.5–3,176.5] | 1.000   |
| Spartalizumab, n (%)                                           | 1 (2.2)                                 | 0 (0.0)                                      | 1.000   |
| Median ICIs cycle [range]                                      | 2 [2–2]                                 | –                                            | –       |
| Median cumulative dose [range] (mg)                            | 200 [200–200]                           | –                                            | –       |

HAIC, hepatic arterial infusion chemotherapy; ICI, immune checkpoint inhibitor; PD-1, programmed cell death protein-1.

**Table S3** Overall tumour response to immunotherapy and hepatic arterial infusion chemotherapy in HCC patients with MVI

| Response | Overall RECIST, n (%) |                     |         | Overall mRECIST, n (%) |                     |         |
|----------|-----------------------|---------------------|---------|------------------------|---------------------|---------|
|          | HAIC (n=70)           | Systemic ICI (n=46) | P value | HAIC (n=70)            | Systemic ICI (n=46) | P value |
| ORR      | 16 (22.86)            | 12 (26.09)          | 0.860   | 17 (24.29)             | 13 (28.26)          | 0.794   |
| DCR      | 29 (41.43)            | 18 (39.13)          | 0.958   | 29 (41.43)             | 18 (39.13)          | 0.958   |

DCR, disease control rate; HAIC, hepatic arterial infusion chemotherapy; HCC, hepatocellular carcinoma; ICI, immune checkpoint inhibitor; MVI, macrovascular invasion; ORR, objective response rate; RECIST, Response Evaluation Criteria in Solid Tumours; mRECIST, modified Response Evaluation Criteria in Solid Tumours.

**Table S4** Vascular response to immunotherapy and hepatic arterial infusion chemotherapy in HCC patients with MVI

| Variables | Vessel response, n (%) |                     |         | PVTT response, n (%) |                     |         | IVCTT response, n (%) |                     |         |
|-----------|------------------------|---------------------|---------|----------------------|---------------------|---------|-----------------------|---------------------|---------|
|           | HAIC (n=70)            | Systemic ICI (n=46) | P value | HAIC (n=60)          | Systemic ICI (n=40) | P value | HAIC (n=16)           | Systemic ICI (n=11) | P value |
| ORRT      | 27 (38.57)             | 21 (45.65)          | 0.572   | 24 (40.00)           | 20 (50.00)          | 0.435   | 7 (43.75)             | 7 (63.64)           | 0.533   |
| DCRT      | 37 (52.86)             | 27 (58.70)          | 0.669   | 33 (55.00)           | 24 (60.00)          | 0.773   | 11 (68.75)            | 9 (81.82)           | 0.662   |

DCRT, disease control rate of tumour thrombi; HAIC, hepatic arterial infusion chemotherapy; HCC, hepatocellular carcinoma; ICI, immune checkpoint inhibitor; IVCTT, inferior vena cava vein tumour thrombus; MVI, macrovascular invasion; ORRT, objective response rate of tumour thrombi; PVTT, portal vein tumor thrombus.

**Table S5** Cox regression for death

| Variables                                | Crude HR (95% CI) | P value | Adjusted HR <sup>†</sup> (95% CI) | P value |
|------------------------------------------|-------------------|---------|-----------------------------------|---------|
| <b>Treatment</b>                         |                   |         |                                   |         |
| HAIC                                     | Ref.              |         | Ref.                              |         |
| Systemic ICI                             | 1.10 (0.71–1.70)  | 0.678   | 0.83 (0.49–1.40)                  | 0.481   |
| HAIC and ICI                             | 0.48 (0.22–1.06)  | 0.068   | 0.47 (0.21–1.04)                  | 0.062   |
| <b>Overall response</b>                  |                   |         |                                   |         |
| No                                       | Ref.              |         | Ref.                              |         |
| Yes                                      | 0.11 (0.05–0.21)  | <0.001  | 0.11 (0.05–0.22)                  | <0.001  |
| <b>Vascular response</b>                 |                   |         |                                   |         |
| No                                       | Ref.              |         | Ref.                              |         |
| Yes                                      | 0.22 (0.14–0.36)  | <0.001  | 0.22 (0.14–0.36)                  | <0.001  |
| <b>Gender</b>                            |                   |         |                                   |         |
| Female                                   | Ref.              |         | –                                 | –       |
| Male                                     | 0.95 (0.57–1.56)  | 0.833   | –                                 | –       |
| <b>Age (years)</b>                       |                   |         |                                   |         |
| <55                                      | Ref.              |         | –                                 | –       |
| ≥55                                      | 1.33 (0.80–2.23)  | 0.276   | –                                 | –       |
| <b>ECOG PS</b>                           |                   |         |                                   |         |
| 0                                        | Ref.              |         | –                                 | –       |
| ≥1                                       | 1.42 (0.92–2.17)  | 0.112   | –                                 | –       |
| <b>Alpha-fetoprotein (ng/mL)</b>         |                   |         |                                   |         |
| <400                                     | Ref.              |         | –                                 | –       |
| ≥400                                     | 1.19 (0.80–1.78)  | 0.386   | –                                 | –       |
| <b>Etiology of chronic liver disease</b> |                   |         |                                   |         |
| No                                       | Ref.              |         | –                                 | –       |
| Yes                                      | 0.83 (0.42–1.65)  | 0.595   | –                                 | –       |
| <b>CLIP</b>                              |                   |         |                                   |         |
| 0–1                                      | Ref.              |         | Ref.                              |         |
| 2–5                                      | 2.19 (1.10–4.37)  | 0.025   | 2.26 (1.10–4.65)                  | 0.027   |
| <b>Child-Pugh stage</b>                  |                   |         |                                   |         |
| A                                        | Ref.              |         | Ref.                              |         |
| B                                        | 1.73 (1.09–2.76)  | 0.021   | 1.57 (0.96–2.56)                  | 0.072   |
| <b>Distant metastases</b>                |                   |         |                                   |         |
| No                                       | Ref.              |         | –                                 | –       |
| Yes                                      | 1.24 (0.80–1.93)  | 0.337   | –                                 | –       |
| <b>Previous treatment TKI</b>            |                   |         |                                   |         |
| No                                       | Ref.              | –       | –                                 | –       |
| Yes                                      | 1.26 (0.84–1.88)  | 0.260   | –                                 | –       |
| <b>Treatment combined with TKI</b>       |                   |         |                                   |         |
| No                                       | Ref.              |         | Ref.                              |         |
| Yes                                      | 0.62 (0.40–0.95)  | 0.030   | 0.51 (0.31–0.86)                  | 0.011   |

<sup>†</sup>, variables with P<0.05 in the univariate analysis and variables of treatment modalities entered the multivariate analysis. Treatment modality, overall response, vascular response, CLIP score, Child-Pugh stage and treatment combined with TKI entered the multivariate analysis. CI, confidence interval; CLIP, Cancer of the Liver Italian Program Scoring System; ECOG PS, Eastern Cooperative Oncology Group performance status; HAIC, hepatic arterial infusion chemotherapy; HR, hazard ratio; ICI, immune checkpoint inhibitor; TKI, tyrosine kinase inhibitor.

**Table S6** Cox regression for progression or death

| Variables                                | Crude HR (95% CI) | P value | Adjusted HR <sup>†</sup> (95% CI) | P value |
|------------------------------------------|-------------------|---------|-----------------------------------|---------|
| <b>Treatment</b>                         |                   |         |                                   |         |
| HAIC                                     | Ref.              |         | Ref.                              |         |
| Systemic ICI                             | 1.03 (0.69–1.55)  | 0.881   | 0.90 (0.59–1.38)                  | 0.639   |
| HAIC and ICI                             | 0.48 (0.24–0.97)  | 0.040   | 0.46 (0.23–0.94)                  | 0.032   |
| <b>Gender</b>                            |                   |         |                                   |         |
| Female                                   | Ref.              |         | –                                 | –       |
| Male                                     | 0.82 (0.52–1.28)  | 0.380   | –                                 | –       |
| <b>Age (years)</b>                       |                   |         |                                   |         |
| <55                                      | Ref.              |         | –                                 | –       |
| ≥55                                      | 1.13 (0.69–1.84)  | 0.620   | –                                 | –       |
| <b>ECOG PS</b>                           |                   |         |                                   |         |
| 0                                        | Ref.              |         | –                                 | –       |
| ≥1                                       | 1.30 (0.87–1.93)  | 0.202   | –                                 | –       |
| <b>Alpha-fetoprotein (ng/mL)</b>         |                   |         |                                   |         |
| <400                                     | Ref.              |         | –                                 | –       |
| ≥400                                     | 1.14 (0.78–1.67)  | 0.493   | –                                 | –       |
| <b>Etiology of chronic liver disease</b> |                   |         |                                   |         |
| No                                       | Ref.              |         | –                                 | –       |
| Yes                                      | 0.89 (0.46–1.70)  | 0.719   | –                                 | –       |
| <b>CLIP</b>                              |                   |         |                                   |         |
| 0–1                                      | Ref.              |         | –                                 | –       |
| 2–5                                      | 1.66 (0.91–3.03)  | 0.099   | –                                 | –       |
| <b>Child-Pugh stage</b>                  |                   |         |                                   |         |
| A                                        | Ref.              |         | Ref.                              |         |
| B                                        | 1.77 (1.15–2.73)  | 0.009   | 1.81 (1.15–2.84)                  | 0.010   |
| <b>Distant metastases</b>                |                   |         |                                   |         |
| No                                       | Ref.              |         | –                                 | –       |
| Yes                                      | 1.25 (0.83–1.89)  | 0.283   | –                                 | –       |
| <b>Previous treatment TKI</b>            |                   |         |                                   |         |
| No                                       | Ref.              |         | –                                 | –       |
| Yes                                      | 1.11 (0.76–1.63)  | 0.577   | –                                 | –       |
| <b>Treatment combined with TKI</b>       |                   |         |                                   |         |
| No                                       | Ref.              |         | –                                 | –       |
| Yes                                      | 0.74 (0.49–1.11)  | 0.143   | –                                 | –       |

<sup>†</sup>, variables with P<0.05 in the univariate analysis and variables of treatment modalities entered the multivariate analysis. Treatment modality and Child-Pugh stage entered the multivariate analysis. CI, confidence interval; CLIP, Cancer of the Liver Italian Program Scoring System; ECOG PS, Eastern Cooperative Oncology Group performance status; HAIC, hepatic arterial infusion chemotherapy; HR, hazard ratio; ICI, immune checkpoint inhibitor; TKI, tyrosine kinase inhibitor.

**Table S7** The levels of serum bilirubin before and after treatment

| Time points                          | HAIC (n=70), mean ± SD | Systemic ICI (n=46), mean ± SD | HAIC and ICI (n=14), mean ± SD | P values <sup>‡</sup> |
|--------------------------------------|------------------------|--------------------------------|--------------------------------|-----------------------|
| Before treatment, mg/dL              | 1.08±0.70              | 1.22±0.88                      | 1.06±0.45                      | 0.570                 |
| After treatment, mg/dL               |                        |                                |                                |                       |
| 4 weeks                              | 1.91±2.31              | 1.97±3.43                      | 1.71±1.32                      | 0.956                 |
| 8 weeks                              | 2.36±4.19              | 3.16±5.58                      | 1.83±1.49                      | 0.553                 |
| 12 weeks                             | 2.08±2.27              | 3.71±7.28                      | 1.55±1.45                      | 0.166                 |
| β-coefficient (P value) <sup>†</sup> | 0.40 (0.001)*          | 0.94 (0.010)*                  | 0.23 (0.120)                   | —                     |

\*, P<0.05; †, regression coefficient indicating time trend by using generalized estimating equation model; ‡, comparison of serum bilirubin levels at each follow-up point between groups using one-way ANOVA. ANOVA, analysis of variance; HAIC, hepatic arterial infusion chemotherapy; ICI, immune checkpoint inhibitor; SD, standard deviation.

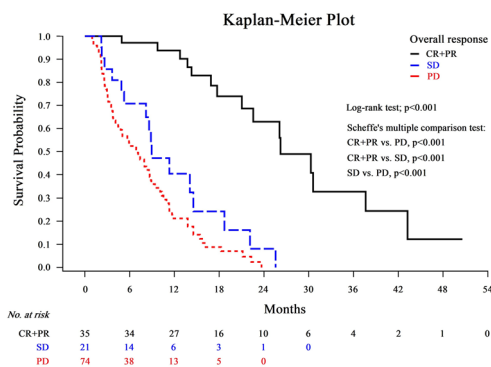

**Figure S1** Kaplan-Meier curve for overall survival by overall RECIST. CR, complete response; PD, progressive disease; PR, partial response; RECIST, Response Evaluation Criteria in Solid Tumors; SD, stable disease.

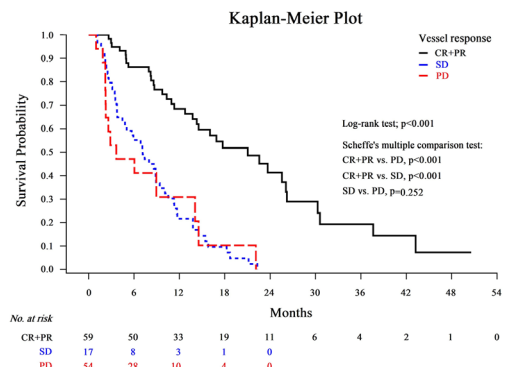

**Figure S3** Kaplan-Meier curve for overall survival by vessel RECIST. CR, complete response; PD, progressive disease; PR, partial response; RECIST, Response Evaluation Criteria in Solid Tumors; SD, stable disease.

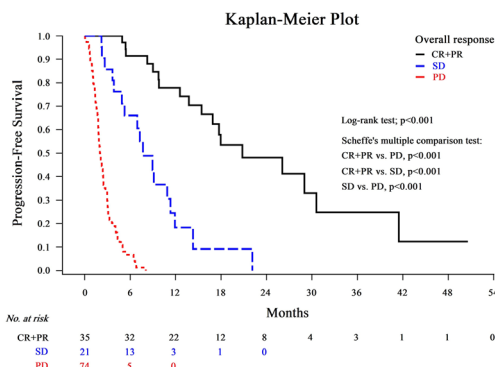

**Figure S2** Kaplan-Meier curve for progression-free survival by overall RECIST. CR, complete response; PD, progressive disease; PR, partial response; RECIST, Response Evaluation Criteria in Solid Tumors; SD, stable disease.

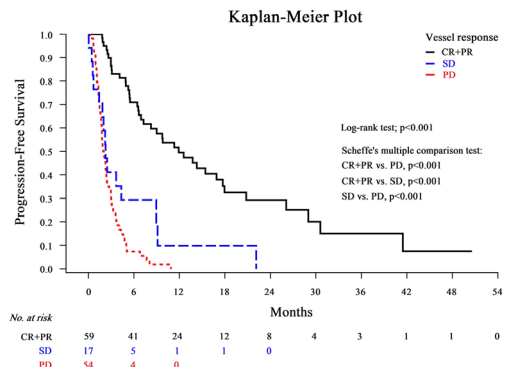

**Figure S4** Kaplan-Meier curve for progression-free survival by vessel RECIST. CR, complete response; PD, progressive disease; PR, partial response; RECIST, Response Evaluation Criteria in Solid Tumors; SD, stable disease.

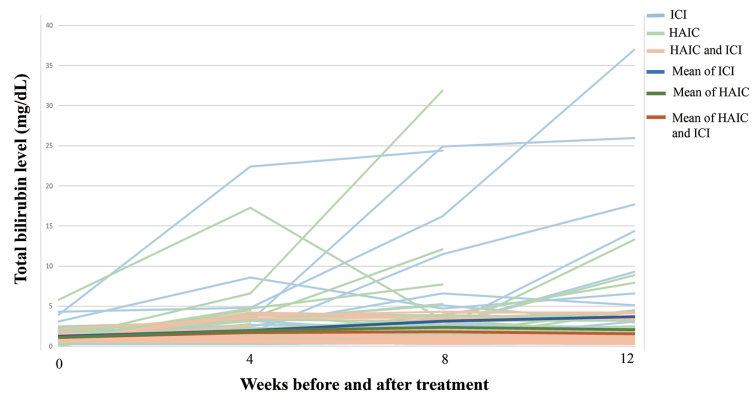

**Figure S5** Dynamic changes in the levels of serum total bilirubin before and after treatment. HAIC, hepatic arterial infusion chemotherapy; ICI, immune checkpoint inhibitor.
